# Supplementary material for: Does cleaning of venipuncture site with alcohol affect blood ethanol concentration?
Source: PubMed Central journal article supplement (PMC11133929; doi:10.1016/j.heliyon.2024.e31517), 2024-05-17
Supplement: mmc1.pdf [file mmc1.pdf]

### INTENDED USE

Reagent for in vitro quantitative determination of ETHANOL in human serum or plasma on spectrophotometers or Clinical Biochemistry analyzer listed below.

### SUMMARY AND BACKGROUND OF THE CLINICAL UTILITY (1-2-3-4-5)

Ethanol (ethyl alcohol) is a widely used and often abused chemical substance. The main pharmacological action of ethanol is the depression of CNS. When consumed with other CNS depressant drugs, ethanol has a potentiating or synergistic depressant effect. The mechanisms of depressant action of ethanol are complex and not fully understood, but likely deal with enhancement of main inhibitory neurons and impairment of excitatory neurons.

### PRINCIPLE OF THE METHOD

Ethanol is oxidized by enzyme Alcohol Dehydrogenase (ADH) in the presence of NAD. Absorbance increase per unit time, due to formation of NADH, is proportional to the concentration of sample ethanol and can be monitored at 340 nm.

### REAGENT COMPOSITION

#### R1:

- Buffer (pH: 9,0) 300 mmol/l

#### R2:

- Buffer (pH: 6,6) 40mmol/l
- NAD  $\geq 10$  mmol/l
- ADH  $\geq 200$  kU/L

### SAFETY PRECAUTIONS

For professional in vitro diagnostic use only.

Do not pipette by mouth. Do not ingest. Harmful if swallowed.

Use protection. (Glasses, gloves, gown etc.)

It is recommended that all specimens or reagents of biological origin should be considered potentially infectious. Practice the normal precautions required for handling all laboratory materials in accordance with OSHA's Bloodborne Pathogens Standards.

Causes serious eye irritation. If in eyes rinse cautiously with water for several minutes and get medical advice.

Causes skin irritation. If on skin wash with plenty of water.

Material safety data sheet available for professional users on request.

Dispose of contents/container according to national/international regulations.

### REAGENT HANDLING

Follow the expiration date. Do not use reagent after the expiration date.

Do not run assay by using reagents with different lot number.

Do not compound reagent with any kit and do not add any materials inside the container.

If any air bubbles present in the reagent remove before use.

Discard the reagent if it has developed gross turbidity, change in color, precipitate or other evidence of microbial growth or contamination.

### REAGENT PREPARATION, STABILITY AND STORAGE

Ready for use.

Store refrigerated at 2-8 °C.

Shelf life unopened at 2-8 °C until the expiration date printed on the label.

Components are stable once opened until the expiration date marked in the label if they are stored well closed and care is taken to prevent contamination during their use.

Once opened and onboard refrigerated 21 days.

### SPECIMEN COLLECTION AND PREPARATION

Heparinized or EDTA- plasma, and serum in specimen are recommended.

Collect serum using standard sampling tubes.

Ethanol is stable in serum or heparinized plasma;

For 1 days at 15-25 °C

For 3 days at 2-8 °C.

Ethanol is volatile! Immediately after use, close carefully the standard dropper.

Protect from light and avoid repeated freeze.

Centrifuge samples containing precipitate before performing the assay

### INTERFERENCE

In serum, no interference was observed by the presence of:

|               |                   |
|---------------|-------------------|
| Hemoglobin    | $\leq 500$ mg/dl  |
| Bilirubin     | $\leq 33$ mg/dl   |
| Lipids        | $\leq 1200$ mg/dl |
| Ascorbic acid | $\leq 50$ mg/dl   |

In urine, no interference was observed by the presence of:

|            |                   |
|------------|-------------------|
| Hemoglobin | $\leq 500$ mg/dl  |
| Glucose    | $\leq 1000$ mg/dl |
| Urea       | $\leq 4600$ mg/dl |
| Creatinine | $\leq 630$ mg/dl  |

### ASSAY PROCESS

*Materials provided:* Ethanol Reagent

*Materials required but not provided:* General laboratory equipment

Procal Ethanol Calibrator, Procon Ethanol. Spectrophotometer with thermostatic cuvette holder or biochemistry autoanalyzer in the list.

The frequency of routine calibration is 7 days.

If there is a change in reagent lot number or major maintenance performed on the analyzer or if control results fall outside acceptable range recalibration is required.

A level of an appropriate quality control should be run every 24 hours to verify the accuracy of the measurement procedure.

**MANUEL PROCEDURE**

|                    |                 |
|--------------------|-----------------|
| Assay type         | : Endpoint      |
| Wavelength         | :340 nm         |
| Optical light path | : 1 cm          |
| Temperature        | : 37 °C         |
| Direction          | : Increase      |
| Zero adjustment    | : Reagent blank |
| Sample/Calibrator  | :50 µl          |
| R1                 | :1000 µl        |
| R2                 | :250 µl         |

Mix R1 and Sample and incubate 5 min at +37°C. Then add R2. Mix, after 90 seconds read the absorbance against distilled water by incubating 37°C. Perform other two readings at 60 seconds intervals.

**REFERENCE RANGE**

1. 30 - 120 mg/dl euphoria, diminution of attention and control
2. 120 - 250 mg/dl excitement, reduced perception, increased reaction times
3. 250 - 400 mg/dl confusion, disturbed vision, muscular incoordination
4. > 400 mg/dl unconsciousness, possible death

This range is given for orientation only; each laboratory should establish its own reference range

**MEASURING RANGE**

**Linearity:** The method is linear up to 600 mg/dl. At Higher concentrations, dilute the sample 1+1 with %0.9 NaCl and multiply the result by factor 2.

**The limit of detection:** 3,0 mg/dl.

**Precision:**

**Within run**

| Sample   | Mean (mg/dl) | SD   | % CV |
|----------|--------------|------|------|
| Sample 1 | 40,4         | 0,5  | 1,24 |
| Sample 2 | 151,1        | 0,84 | 0,56 |

**Between days**

| Sample   | Mean (mg/dl) | SD   | % CV |
|----------|--------------|------|------|
| Sample 1 | 40,8         | 0,79 | ≤8,1 |
| Sample 2 | 151,5        | 2,32 | ≤5,8 |

**QUALITY CONTROLS**

The control intervals and limits must be adapted to the individual laboratory and country-specific requirements. Values obtained should fall within established limits. Each laboratory should establish corrective measures to be taken if values fall outside the limits.

A level of an appropriate quality control should be run every 24 hours to verify the accuracy of the measurement procedure

It is recommended to use IMPROGEN ETHANOL Kit with controls below

- ProConN Ethanol ETH0011 1x5 ml
- ProConN Ethanol ETH0021 1x1 ml

**CALIBRATION:**

The frequency of routine calibration is 7 days.

If there is a change in reagent lot number or major maintenance performed on the analyzer or if control results fall outside acceptable range recalibration is required.

It is recommended to use IMPROGEN ETHANOL Kit the calibrator below

- ProCal Ethanol 1 mL – ETH0511
- ProCal Ethanol 1 mL – ETH0521

**BIBLIOGRAPHY**

1. F. Ishizawa, K. Miyata, S. Misawa, A handy and simple apparatus for the determination of ethanol in blood, Natl. Res. Inst. Police Sci. 38 (1985) 25–28.
- 2.A.W. Jones, Measurement ethanol in saline with QED: enzymatic test device: comparison of results with bloodand breath-alcohol concentrations, J. Anal. Toxicol. 19 (1995) 169–174
3. F. Moriya, Y. Hashimoto, Application of the Triage™ panel for drugs of abuse to forensic blood samples, Jpn. J. Legal Med. 50 (1996) 50–56.
4. A.H. Wu, S.S. Wong, K.G. Johnson, J. Callies, D.X. Shu, We Donn, et al., Evaluation of triage system for emergency drugs-of abuse testing in urine, J. Anal. Toxicol. 17 (1993) 241–245.
5. M. Saitou, M. Nakayama, Rapid and simple determination of alcohol in blood using detector tube, Natl. Res. Inst. Police Sci. 36 (1983) 44–47.

**COMPATIBLE ANALYZERS LIST ( REF )**

ImproGen can provide dedicated diagnostic reagents for the Beckman Coulter™ ( AU and Dx C Series), Abbott™ ( Architect, Aeroset Series), Siemens™ ( Advia and Dimension Series), Mindray™ BS Serisi ( BS2000, BS2000M, BS800, BS400, BS380 ), Snibe™ ( Biossays Series), Tokyo Boeki™ Biolise Series, Erba™ (XL Series), Dirui™ ( CS Series ), Randox RX series, Hitachi™, and Konelab™ All Series range of chemistry analysers providing you with freedom of choice from an independent manufacturer

**SYMBOL KEYS**

|                                                                                                                  |                                                                                                                      |                                                                                                                |                                                                                                                      |
|------------------------------------------------------------------------------------------------------------------|----------------------------------------------------------------------------------------------------------------------|----------------------------------------------------------------------------------------------------------------|----------------------------------------------------------------------------------------------------------------------|
|  In Vitro Diagnostic Use Only |  Reagent 1                        |  Biological Hazard          |  Keep Away From Direct Sunlight |
|  Batch Number                 |  Reagent 2                        |  Manufacturer               |  Contents                       |
|  Order Number                 |  Reagent 3                        |  Authorized Representative |  Temperature Limit              |
|  Serial Number                |  Caution! Refer enclosed document |  Prescription Use Only      |  CE Mark                        |
|  Consult Instruction For Use  |  Total                            |  Expiration Date            |  Liquid Format                  |

**MANUFACTURER**

 Improgen Diagnostik Kimya San. Tic. Ltd. Şti | İkitelli O.S.B İsdök San. Sit. 2 Blok No:1 Başakşehir / İSTANBUL  
T: +90(212) 809 00 09 F: +90 (212) 809 00 01  
www.improgen.com info@improgen.com support@improgen.com
